# Supplementary material for: Simultaneous determination of 78 pesticide residues and 16 mycotoxins in tsampa by an improved QuEChERS method coupled with ultra performance liquid chromatography-tandem mass spectrometry
Source: Royal Society of Chemistry journal article supplement (doi:10.1039/d4ay00735b), 2024-01-01
Supplement: d4ay00735b1.pdf [file d4ay00735b1.pdf]

## Supporting Information

### Simultaneous determination of 78 pesticide residues and 16 mycotoxins in tsampa by an improved QuEChERS method coupled with ultra performance liquid chromatography-tandem mass spectrometry

Xiaoxian Yan<sup>1,2</sup>, Hongyan Zhang<sup>1,2</sup>, Zhehui Zhu<sup>3</sup>, Yujie Xie<sup>2</sup>, Xingqiang Wu<sup>2</sup>, Zhihong Shi<sup>1,\*</sup>,  
Chunlin Fan<sup>2</sup>, Hui Chen<sup>2,\*</sup>

<sup>1</sup> College of Chemistry and Materials Science, Hebei University, Baoding 071002, China

<sup>2</sup> Chinese Academy of Inspection and Quarantine, Beijing 100176, China

<sup>3</sup> Tibet Product Quality Supervision and Inspection Institute, Lhasa 850000, China

\*Corresponding authors:

Dr. Zhihong Shi

E-mail addresses: shizhihong@hbu.edu.cn

Tel.: +86 13582289470

Dr. Hui Chen

E-mail addresses: chenh@caiq.org.cn

Tel.: +86 10 53897243

**This supporting information consists of one section:**

1 、 Detection information for all samples tested

Table S1 Results for all samples

| Sample | Aflatoxin G2<br>(µg/kg) | Cadusafos<br>(µg/kg) | Carbendazim<br>(µg/kg) | Deoxynivalenol<br>(µg/kg) | HT-2 Toxin<br>(µg/kg) | Hexaconazole<br>(µg/kg) | Ochratoxin A<br>(µg/kg) | T-2 Toxin<br>(µg/kg) | Triadimefon<br>(µg/kg) |
|--------|-------------------------|----------------------|------------------------|---------------------------|-----------------------|-------------------------|-------------------------|----------------------|------------------------|
| 1      | 5.65                    |                      |                        | 13.71                     |                       |                         |                         | 6.42                 |                        |
| 2      |                         | 0.47                 |                        |                           |                       | 1.48                    |                         |                      |                        |
| 3      | 4.10                    | 0.50                 |                        |                           |                       | 3.70                    | 18.12                   | 12.67                |                        |
| 4      |                         |                      |                        |                           | 17.63                 | 2.24                    |                         |                      |                        |
| 5      |                         |                      |                        |                           | 6.14                  | 1.45                    |                         |                      |                        |
| 6      |                         |                      |                        |                           |                       | 1.18                    |                         |                      |                        |
| 7      |                         |                      |                        |                           |                       | 1.78                    |                         |                      |                        |
| 8      |                         | 1.06                 |                        |                           |                       | 3.15                    |                         |                      |                        |
| 9      |                         | 0.93                 |                        |                           |                       | 5.46                    |                         |                      |                        |
| 10     |                         |                      | 3.38                   |                           |                       |                         | 2.05                    |                      |                        |
| 11     |                         |                      |                        |                           |                       | 5.60                    |                         |                      |                        |
| 12     |                         |                      |                        |                           |                       |                         |                         |                      |                        |
| 13     |                         |                      |                        |                           |                       | 3.19                    |                         |                      |                        |
| 14     |                         |                      |                        |                           |                       | 3.64                    |                         |                      |                        |
| 15     |                         |                      |                        |                           |                       | 4.50                    |                         |                      |                        |
| 16     | 5.37                    |                      |                        |                           |                       | 3.81                    |                         |                      |                        |
| 17     | 7.43                    |                      |                        |                           |                       | 4.34                    |                         |                      |                        |
| 18     |                         |                      |                        |                           |                       | 10.79                   |                         |                      |                        |
| 19     | 5.87                    |                      |                        |                           |                       |                         |                         |                      |                        |
| 20     |                         |                      |                        |                           |                       | 3.89                    |                         |                      |                        |
| 21     |                         |                      |                        |                           |                       | 3.27                    |                         |                      |                        |
| 22     |                         |                      |                        |                           |                       |                         | 1.66                    |                      |                        |
| 23     |                         |                      |                        |                           |                       | 11.77                   |                         |                      |                        |

---

| Sample | Aflatoxin G2 | Cadusafos | Carbendazim | Deoxynivalenol | HT-2 Toxin | Hexaconazole | Ochratoxin A | T-2 Toxin | Triadimefon |
|--------|--------------|-----------|-------------|----------------|------------|--------------|--------------|-----------|-------------|
| 24     |              |           |             |                |            |              |              |           | 1.45        |
| 25     |              |           |             |                |            |              |              |           |             |
| 26     |              |           |             |                |            |              |              |           |             |
| 27     |              |           |             |                |            | 5.46         |              |           |             |
| 28     |              |           |             |                |            |              |              |           |             |
| 29     |              |           |             |                |            |              |              |           |             |
| 30     |              |           |             |                |            | 9.17         |              |           |             |

---
